# Supplementary material
Source: publisher site journal article supplement (https://www.spandidos-publications.com/1211/downloadSupplementary)
Supplement: Supplementary file 1 [file downloadSupplementary]

Table SI. Associations between FHL1 expression and clinical characteristics in patients with glioma. The FHL1 positive rate was significantly correlated with WHO classification of glioma grades.

| Pathological characteristics | n  | FHL expression |          | P-value |
|------------------------------|----|----------------|----------|---------|
|                              |    | Positive       | Negative |         |
| Age at diagnosis, y          |    |                |          | 0.834   |
| ≥60                          | 34 | 15             | 19       |         |
| <60                          | 80 | 37             | 43       |         |
| KPS at diagnosis             |    |                |          | 0.052   |
| ≥70                          | 63 | 30             | 33       |         |
| <70                          | 51 | 19             | 32       |         |
| Sex                          |    |                |          | 0.561   |
| Male                         | 58 | 28             | 30       |         |
| Female                       | 56 | 24             | 32       |         |
| WHO pathological grade       |    |                |          | <0.001  |
| I                            | 16 | 14             | 2        |         |
| II                           | 40 | 27             | 13       |         |
| III                          | 24 | 7              | 17       |         |
| IV                           | 34 | 4              | 30       |         |
| Extent of resection          |    |                |          | 0.160   |
| Total resection              | 62 | 32             | 30       |         |
| Partial resection            | 52 | 20             | 32       |         |

FHL1, four-and-a-half LIM domains 1; KPS, Karnofsky performance status; WHO, World Health Organization.
